# Supplementary material
Source: HighWire-hosted journal article supplement (https://www.cmajopen.ca/highwire/filestream/85468/field_highwire_adjunct_files/1/2020-0128-2-at.pdf)
Supplement: 2020-0128-2-at.pdf [file 2020-0128-2-at.pdf]

## CONCEPTT Cost Implications

### S2. Average or general unit cost of physician services per woman/infant by province and study group

| Service                                                                                                                                                                                   | Province         | CGM Group<br>N=100         |                                |                       | SMBG Group<br>N=102        |                                |                       |
|-------------------------------------------------------------------------------------------------------------------------------------------------------------------------------------------|------------------|----------------------------|--------------------------------|-----------------------|----------------------------|--------------------------------|-----------------------|
|                                                                                                                                                                                           |                  | n<br>women/infant<br>dyads | Average<br>Cost Per<br>Patient | Standard<br>Deviation | n<br>women/infant<br>dyads | Average<br>Cost Per<br>Patient | Standard<br>Deviation |
| 1. Number of "unscheduled" contacts (via phone, patient visits/appointments, email, text, etc) with the nurse, doctor, any research staff, or the CGM helpline since the last study visit | Ontario          | 96                         | \$247.58                       | \$218.67              | 91                         | \$154.15                       | \$98.38               |
|                                                                                                                                                                                           | British Columbia | 96                         | \$235.32                       | \$207.82              | 91                         | \$146.54                       | \$93.52               |
|                                                                                                                                                                                           | Alberta          | 96                         | \$259.62                       | \$229.31              | 91                         | \$161.65                       | \$103.17              |
| 1a. For diabetes management                                                                                                                                                               | Ontario          | 89                         | \$126.69                       | \$103.94              | 87                         | \$131.76                       | \$93.26               |
|                                                                                                                                                                                           | British Columbia | 89                         | \$120.44                       | \$98.80               | 87                         | \$125.25                       | \$88.65               |
|                                                                                                                                                                                           | Alberta          | 89                         | \$132.86                       | \$108.99              | 87                         | \$138.17                       | \$97.79               |
| 1b. For CGM device                                                                                                                                                                        | Ontario          | 63                         | \$44.75                        | \$38.78               | 6                          | \$17.81                        | \$6.90                |
|                                                                                                                                                                                           | British Columbia | 63                         | \$42.53                        | \$36.86               | 6                          | \$16.93                        | \$6.56                |
|                                                                                                                                                                                           | Alberta          | 63                         | \$46.92                        | \$40.66               | 6                          | \$18.68                        | \$7.23                |
| 1c. For both diabetes management and CGM device questions                                                                                                                                 | Ontario          | 42                         | \$171.14                       | \$182.09              | 14                         | \$47.71                        | \$29.97               |
|                                                                                                                                                                                           | British Columbia | 42                         | \$162.62                       | \$173.03              | 14                         | \$45.34                        | \$28.48               |
|                                                                                                                                                                                           | Alberta          | 42                         | \$179.46                       | \$190.95              | 14                         | \$50.04                        | \$31.43               |
| 1d. Other (reason not specified)                                                                                                                                                          | Ontario          | 51                         | \$48.72                        | \$57.61               | 46                         | \$38.92                        | \$34.01               |
|                                                                                                                                                                                           | British Columbia | 51                         | \$46.32                        | \$54.76               | 46                         | \$37.00                        | \$32.33               |
|                                                                                                                                                                                           | Alberta          | 51                         | \$51.10                        | \$60.41               | 46                         | \$40.81                        | \$35.67               |
| 2.a. Maternal antenatal hospital admission not for delivery $\geq$ 24 hours physician fees and ward cost                                                                                  | Ontario          | 22                         | \$1,993.31                     | \$1,376.42            | 17                         | \$2,008.27                     | \$1,067.96            |
|                                                                                                                                                                                           | British Columbia | 22                         | \$1,963.55                     | \$1,338.12            | 17                         | \$1,980.10                     | \$1,037.16            |
|                                                                                                                                                                                           | Alberta          | 22                         | \$1,951.74                     | \$1,336.93            | 17                         | \$1,968.02                     | \$1,036.60            |
| 2.b. Maternal antenatal hospital length of stay not for delivery <24 hours (Obstetrical Day Unit) physician fees and ward cost                                                            | Ontario          | 7                          | \$335.03                       | \$127.15              | 8                          | \$260.58                       | \$0.00                |
|                                                                                                                                                                                           | British Columbia | 7                          | \$298.41                       | \$113.25              | 8                          | \$232.10                       | \$0.00                |
|                                                                                                                                                                                           | Alberta          | 7                          | \$303.60                       | \$115.22              | 8                          | \$236.13                       | \$0.00                |
| 3. Pregnancy termination $\geq$ 20 weeks physician fees                                                                                                                                   | Ontario          | 0                          | -                              | -                     | 1                          | \$310.03                       | -                     |
|                                                                                                                                                                                           | British Columbia | 0                          | -                              | -                     | 1                          | \$404.20                       | -                     |
|                                                                                                                                                                                           | Alberta          | 0                          | -                              | -                     | 1                          | \$446.85                       | -                     |
| 4. Stillbirth physician fees                                                                                                                                                              | Ontario          | 0                          | -                              | -                     | 1                          | \$937.30                       | -                     |
|                                                                                                                                                                                           | British Columbia | 0                          | -                              | -                     | 1                          | \$834.70                       | -                     |
|                                                                                                                                                                                           | Alberta          | 0                          | -                              | -                     | 1                          | \$690.67                       | -                     |
| 5. Induction                                                                                                                                                                              | Ontario          | 49                         | \$67.75                        | -                     | 42                         | \$67.75                        | -                     |

Appendix 2, as supplied by the authors. Appendix to: Ahmed RJ, Gafni A, Hutton EK, et al. The cost implications of continuous glucose monitoring in pregnant women with type 1 diabetes in 3 Canadian provinces: a posthoc cost analysis of the CONCEPTT trial. *CMAJ Open* 2021. DOI:10.9778/cmajo.20200128. Copyright © 2021 The Author(s) or their employer(s). To receive this resource in an accessible format, please contact us at [cmajgroup@cmaj.ca](mailto:cmajgroup@cmaj.ca).

## CONCEPTT Cost Implications

| Service                                                                                             | Province            | CGM Group<br>N=100         |                                |                       | SMBG Group<br>N=102        |                                |                       |
|-----------------------------------------------------------------------------------------------------|---------------------|----------------------------|--------------------------------|-----------------------|----------------------------|--------------------------------|-----------------------|
|                                                                                                     |                     | n<br>women/infant<br>dyads | Average<br>Cost Per<br>Patient | Standard<br>Deviation | n<br>women/infant<br>dyads | Average<br>Cost Per<br>Patient | Standard<br>Deviation |
|                                                                                                     | British<br>Columbia | 49                         | \$37.77                        | -                     | 42                         | \$37.77                        | -                     |
|                                                                                                     | Alberta             | 49                         | \$120.21                       | -                     | 42                         | \$120.21                       | -                     |
| 6. Spontaneous vaginal<br>delivery                                                                  | Ontario             | 28                         | \$756.96                       | \$135.43              | 18                         | \$796.53                       | \$142.72              |
|                                                                                                     | British<br>Columbia | 28                         | \$614.65                       | \$32.36               | 18                         | \$623.62                       | \$31.52               |
|                                                                                                     | Alberta             | 28                         | \$505.10                       | \$45.15               | 18                         | \$517.85                       | \$44.78               |
| 7. Operative vaginal delivery                                                                       | Ontario             | 9                          | \$743.89                       | \$165.50              | 8                          | \$820.14                       | \$181.60              |
|                                                                                                     | British<br>Columbia | 9                          | \$796.43                       | \$34.90               | 8                          | \$810.98                       | \$37.47               |
|                                                                                                     | Alberta             | 9                          | \$624.28                       | \$43.40               | 8                          | \$654.49                       | \$51.97               |
| 8. Elective Caesarean delivery                                                                      | Ontario             | 37                         | \$1,358.67                     | \$308.19              | 44                         | \$1,387.43                     | \$297.42              |
|                                                                                                     | British<br>Columbia | 37                         | \$1,737.03                     | \$279.70              | 44                         | \$1,718.74                     | \$268.83              |
|                                                                                                     | Alberta             | 37                         | \$1,291.61                     | \$148.96              | 44                         | \$1,304.93                     | \$144.95              |
| 9. Emergency Caesarean<br>delivery                                                                  | Ontario             | 26                         | \$991.18                       | \$145.11              | 30                         | \$982.06                       | \$165.57              |
|                                                                                                     | British<br>Columbia | 26                         | \$968.87                       | \$91.73               | 30                         | \$964.65                       | \$112.54              |
|                                                                                                     | Alberta             | 26                         | \$938.66                       | \$44.07               | 30                         | \$945.71                       | \$87.04               |
| 10. Antenatal ward duration                                                                         | All<br>Provinces    | 100                        | \$719.96                       | \$1,332.18            | 102                        | \$1,253.29                     | \$2,522.84            |
| 11. Labour and delivery ward<br>duration                                                            | All<br>Provinces    | 100                        | \$3,285.07                     | \$3,048.77            | 102                        | \$4,082.51                     | \$4,554.21            |
| 12. Operating room ward<br>duration                                                                 | All<br>Provinces    | 72                         | \$1,289.97                     | \$111.12              | 84                         | \$1,277.25                     | \$139.32              |
| 13. Postpartum ward duration                                                                        | All<br>Provinces    | 100                        | \$2,463.09                     | \$2,205.01            | 102                        | \$2,415.12                     | \$1,540.50            |
| 14. NICU Level 2 physician<br>care                                                                  | Ontario             | 19                         | \$691.61                       | \$433.60              | 30                         | \$1,064.32                     | \$1,041.66            |
|                                                                                                     | British<br>Columbia | 19                         | \$1,028.57                     | \$542.11              | 30                         | \$1,444.72                     | \$1,114.31            |
|                                                                                                     | Alberta             | 19                         | \$1,077.31                     | \$821.31              | 30                         | \$1,783.27                     | \$1,973.05            |
| 15. NICU Level 3 physician<br>care                                                                  | Ontario             | 11                         | \$2,131.23                     | \$699.76              | 15                         | \$2,505.35                     | \$1,469.30            |
|                                                                                                     | British<br>Columbia | 11                         | \$2,883.81                     | \$732.52              | 15                         | \$3,217.04                     | \$1,637.07            |
|                                                                                                     | Alberta             | 11                         | \$2,537.45                     | \$909.55              | 15                         | \$3,101.33                     | \$2,142.06            |
| 16. NICU Level 2 hospital<br>ward duration                                                          | All<br>Provinces    | 19                         | \$4,967.49                     | \$4,672.21            | 30                         | \$9,047.56                     | \$11,103.68           |
| 17. NICU Level 3 hospital<br>ward duration                                                          | All<br>Provinces    | 11                         | \$25,377.48                    | \$9,874.10            | 15                         | \$31,925.23                    | \$23,753.01           |
| Medtronic CGM for<br>Medtronic Insulin Pumps                                                        | All<br>Provinces    | 42                         | \$700.00                       | \$0.00                | 0                          | -                              | -                     |
| Guardian CGM Devices Used<br>for Non-Medtronic Insulin<br>Pumps or Multiple Dose<br>Injection Users | All<br>Provinces    | 58                         | \$2,000.00                     | \$0.00                | 0                          | -                              | -                     |

Appendix 2, as supplied by the authors. Appendix to: Ahmed RJ, Gafni A, Hutton EK, et al. The cost implications of continuous glucose monitoring in pregnant women with type 1 diabetes in 3 Canadian provinces: a posthoc cost analysis of the CONCEPTT trial. *CMAJ Open* 2021. DOI:10.9778/cmajo.20200128. Copyright © 2021 The Author(s) or their employer(s). To receive this resource in an accessible format, please contact us at [cmajgroup@cmaj.ca](mailto:cmajgroup@cmaj.ca).

## CONCEPTT Cost Implications

| Service                                                                     | Province      | CGM Group<br>N=100         |                                |                       | SMBG Group<br>N=102        |                                |                       |
|-----------------------------------------------------------------------------|---------------|----------------------------|--------------------------------|-----------------------|----------------------------|--------------------------------|-----------------------|
|                                                                             |               | n<br>women/infant<br>dyads | Average<br>Cost Per<br>Patient | Standard<br>Deviation | n<br>women/infant<br>dyads | Average<br>Cost Per<br>Patient | Standard<br>Deviation |
| CGM Devices for All Pump Types and Multiple Injection Users                 | All Provinces | 100                        | \$1,454.00                     | \$644.86              | 0                          | -                              | -                     |
| CGM Sensors for All Pump Types and Multiple Daily Injection Users           | All Provinces | 100                        | \$1,880.40                     | \$174.61              | 0                          | -                              | -                     |
| Number of Glucometers Used and Cost                                         | All Provinces | 100                        | \$45.00                        | \$0.00                | 102                        | \$45.00                        | \$0.00                |
| Number of Glucose Testing Strips Used and Cost                              | All Provinces | 100                        | \$1,231.36                     | \$113.50              | 102                        | \$1,189.44                     | \$133.62              |
| All CGM Devices and Sensors                                                 | All Provinces | 100                        | \$3,334.40                     | \$635.79              | 102                        | -                              | -                     |
| All Glucometers and Glucose Testing Strips                                  | All Provinces | 100                        | \$1,276.36                     | \$113.50              | 102                        | \$1,234.44                     | \$133.62              |
| Total Cost of CGM Devices, Sensors, glucometers, and glucose testing strips | All Provinces | 100                        | \$4,610.76                     | \$656.47              | 102                        | \$1,234.44                     | \$133.62              |

\*Note: Average unit costs were calculated using the total cost divided by the number of women or infants that actually incurred that service to illustrate a general form of unit cost; whereas actual fees varied for each study participant depending on the number of services received for each woman/infant, the duration of the service, or the time of day and week physician fee premiums applicable according to each province's Schedule of Medical Benefits.
